# Supplementary material for: Utility of Big Data to Explore Medication Adherence in Māori and Non-Māori Community-Dwelling Older Adults with Heart Failure in Aotearoa New Zealand: A Cross-sectional Study
Source: PubMed Central journal article supplement — Drugs Aging. 2023 Jun 29;40(9):847–55. doi: 10.1007/s40266-023-01044-2 (PMC10450015; doi:10.1007/s40266-023-01044-2), 2023-06-29
Supplement: 40266_2023_1044_MOESM1_ESM.pdf [file 40266_2023_1044_MOESM1_ESM.pdf]

**Journal:** Drugs & Ageing

**Title:** Utility of Big data to explore medication adherence in Māori and non-Māori community-dwelling older adults with heart failure in Aotearoa New Zealand – a cross-sectional study.

**Authors**

**Joanna Hikaka.** Faculty of Medicine and Health Sciences, University of Auckland, Auckland, New Zealand.

**Rebecca Abey-Nesbit.** Department of Medicine, University of Otago, Christchurch, New Zealand.

**Brendon McIntosh.**<sup>1</sup> Department of Medicine, University of Otago, Christchurch, New Zealand.

<sup>2</sup> Kia Kaha Chemists, Christchurch, New Zealand

**Philip J. Schluter.** 1. Te Kaupeka Oranga/Faculty of Health, Te Whare Wānanga o Waitaha/University of Christchurch, 8041, New Zealand. 2. School of Clinical Medicine, Primary Care Clinical Unit, The University of Queensland, Brisbane, Australia

**Prasad S Nishtala.** Department of Life Sciences, Centre for Therapeutic Innovation, University of Bath, United Kingdom

**Richard Scrase.** Department of Medicine, University of Otago, Christchurch

**Hamish A Jamieson.** Department of Medicine, University of Otago, Christchurch

**Supplementary Table 1. Adjusted multivariable results of confounders**

| <b>Factor</b>                      | <b>Measure</b>                    | <b>Adjusted CI</b> |
|------------------------------------|-----------------------------------|--------------------|
| Sex                                | 1. Female                         | 1.01 (0.92, 1.11)  |
|                                    | 2. Male                           | 1                  |
| Married                            | 1. Married                        | 0.729 (0.64, 0.82) |
|                                    | 2. Not married                    | 1                  |
| Lives alone                        | 0. No                             | 0.83 ((0.71, 0.96) |
|                                    | 1. Yes                            | 1                  |
| Distance walked                    | 0. Did not walk                   | 0.69 (0.55, 0.85)  |
|                                    | 1. Less than 5 meters             | 0.87 (0.75, 1.01)  |
|                                    | 2. 5-99m                          | 0.93 (0.83, 1.05)  |
|                                    | 3. 100+m                          | 1                  |
| Participation in social activities | 0. Never                          | 1.12 (0.99, 1.27)  |
|                                    | 1. More than 30 days ago          | 1.1 (0.89, 1.21)   |
|                                    | 2. 8-30 days ago                  | 1.08 (0.95, 1.22)  |
|                                    | 3. In the last 7 days             | 1                  |
| Lives with helper                  | 0. Does not live with helper      | 1.21 (1.04, 1.42)  |
|                                    | 1. 6 months or less               | 1.12 (0.58, 2.19)  |
|                                    | 2. More than 6 months             | 1.19 (1, 1.42)     |
|                                    | 3. No informal care               | 1                  |
| Carer stress                       | 0. No                             | 0.57 (0.53, 0.63)  |
|                                    | 1. Yes                            | 1                  |
| Palliative care input              | 0. No                             | 2.1 (1.3, 3.5)     |
|                                    | 1. Yes                            | 1                  |
| Self-related health                | 0. Good or excellent              | 1.12 (1.03, 1.23)  |
|                                    | 1. Fair or poor                   | 1                  |
| Alcohol intake                     | 0. No                             | 0.78 (0.71, 0.87)  |
|                                    | 1. Yes                            | 1                  |
| Vision                             | 0. Adequate or minimal difficulty | 1.14 (0.84, 1.56)  |
|                                    | 1. Moderate difficulty            | 1.18 (0.84, 1.67)  |
|                                    | 2. Severe to no vision            | 1                  |
| Dizziness                          | 0. Not present                    | 0.92 (0.83, 1.03)  |
|                                    | 1. Present but not in last 3 days | 1.07 (0.94, 1.24)  |
|                                    | 2. Present in last 3 days         | 1                  |

|             |                                   |                    |
|-------------|-----------------------------------|--------------------|
| Hearing     | 0. Adequate or minimal difficulty | 1.09 (0.94, 1.35)  |
|             | 1. Moderate difficulty            | 1.18 (0.94, 1.48)  |
|             | 2. Severe or no hearing           | 1                  |
| Falls       | 0. No falls in last 90 days       | 0.85 (0.77, 0.93)  |
|             | 1. Fell 31-90 days ago            | 0.97 (0.84, 1.1)   |
|             | 2. Fell within 30 days            | 1                  |
| Fatigue     | 0. None to minimal                | 1.06 (0.95, 1.18)  |
|             | 1. Moderate to severe             | 1                  |
| Swallow     | 0. No difficulty                  | 0.99 (0.87, 1.14)  |
|             | 1. Some difficulty                | 1                  |
| Diabetes    | 0. No                             | 1 (0.91, 1.1)      |
|             | 1. Yes                            | 1                  |
| Parkinson's | 0. No                             | 0.99 (0.74, 1.31)  |
|             | 1. Yes                            | 1                  |
| Dementia    | 0. No                             | 0.6 (0.54, 0.66)   |
|             | 1. Yes                            | 1                  |
| Depression  | 0. No                             | 0.82 ((0.73, 0.92) |
|             | 1. Yes                            | 1                  |
| Anxiety     | 0. No                             | 0.80 (0.7, 0.91)   |
|             | 1. Yes                            | 1                  |
| Stroke      | 0. No                             | 1.01 (0.91, 1.13)  |
|             | 1. Yes                            | 1                  |
| CHD         | 0. No                             | 0.89 (0.81, 0.97)  |
|             | 1. Yes                            | 1                  |
| Bipolar     | 0. No                             | 0.67 (0.5, 0.88)   |
|             | 1. Yes                            | 1                  |
| COPD        | 0. No                             | 1 (0.91, 1.1)      |
|             | 1. Yes                            | 1                  |
